# Supplementary material
Source: Springer Nature journal article supplement (https://www.springermedizin.de/resource/supplementary/13229_2013_116_MOESM4_ESM.pdf/9676208)

**A**

Gene expression relative to 40,XY

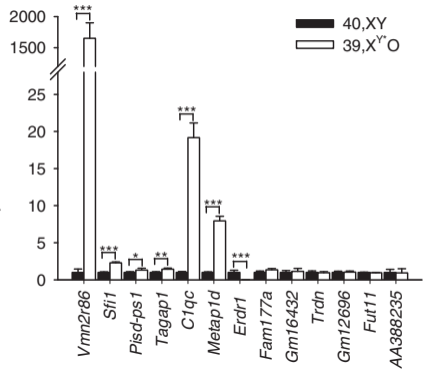**B**

Gene expression relative to 40,XY

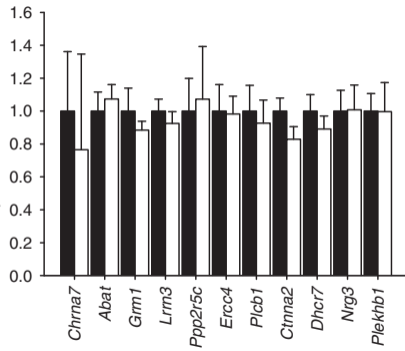

Supplement: MOESM4 [file 9676208]
